# Supplementary material for: Molecular definition of multiple sites of antibody inhibition of malaria transmission-blocking vaccine antigen Pfs25
Source: PubMed Central journal article supplement (PMC5691035; doi:10.1038/s41467-017-01924-3), 2017-11-16
Supplement: 41467_2017_1924_MOESM1_ESM.pdf [file 41467_2017_1924_MOESM1_ESM.pdf]

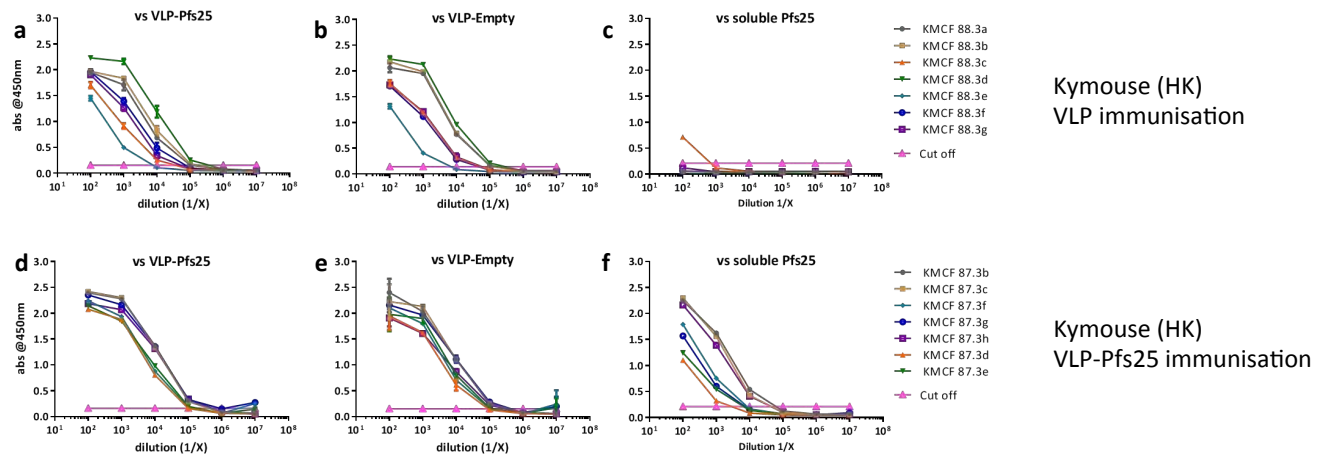

**Supplementary Figure 1. Serum polyclonal titers measured by ELISA for Kymice engineered to express the full set of human immunoglobulin variable, diversity and joining region gene segments for the immunoglobulin heavy chain and the kappa light chain variable and joining region gene segments (HK Kymice).** Serum polyclonal antibody titer for each immunized mouse (KMFC numbers) were determined by limiting dilution ELISA against plate bound VLP-Pfs25 (A and D), VLP (VLP-Empty) (B and E) and soluble Pfs25 protein (C and F). Kymice were immunized with either naked VLP (VLP-Empty (panels A to C) or VLP-Pfs25 (panels D to F)). All mice raised a polyclonal antibody response to the VLP regardless of the presence or absence of the additional Pfs25 antigen (B and E), but only VLP-Pfs25 mice raised a polyclonal response to Pfs25 (Panel A and D compared to panels C and F).

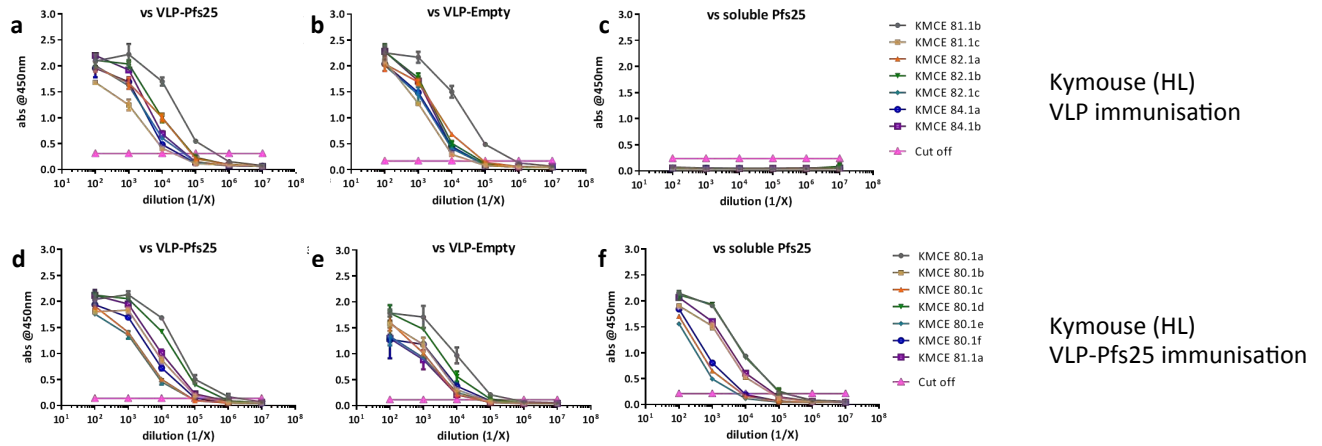

**Supplementary Figure 2. Serum polyclonal titers measured by ELISA for Kymice engineered to express the full set of human immunoglobulin variable, diversity and joining region gene segments for the immunoglobulin heavy chain and the lambda light chain variable and joining region gene segments (HL Kymice).** Serum polyclonal antibody titer for each immunized mouse (KMFC numbers) were determined by limiting dilution ELISA against plate bound VLP-Pfs25 (**A** and **D**), VLP (VLP-Empty) (**B** and **E**) and soluble Pfs25 protein (**C** and **F**). Kymice were immunized with either naked VLP (VLP-Empty (panels **A** to **C**) or VLP-Pfs25 (panels **D** to **F**). All mice raised a polyclonal antibody response to the VLP regardless of the presence or absence of the additional Pfs25 antigen (**B** and **E**), but only VLP-Pfs25 mice raised a polyclonal response to Pfs25 (Panel **A** and **D** compared to panels **C** and **F**).

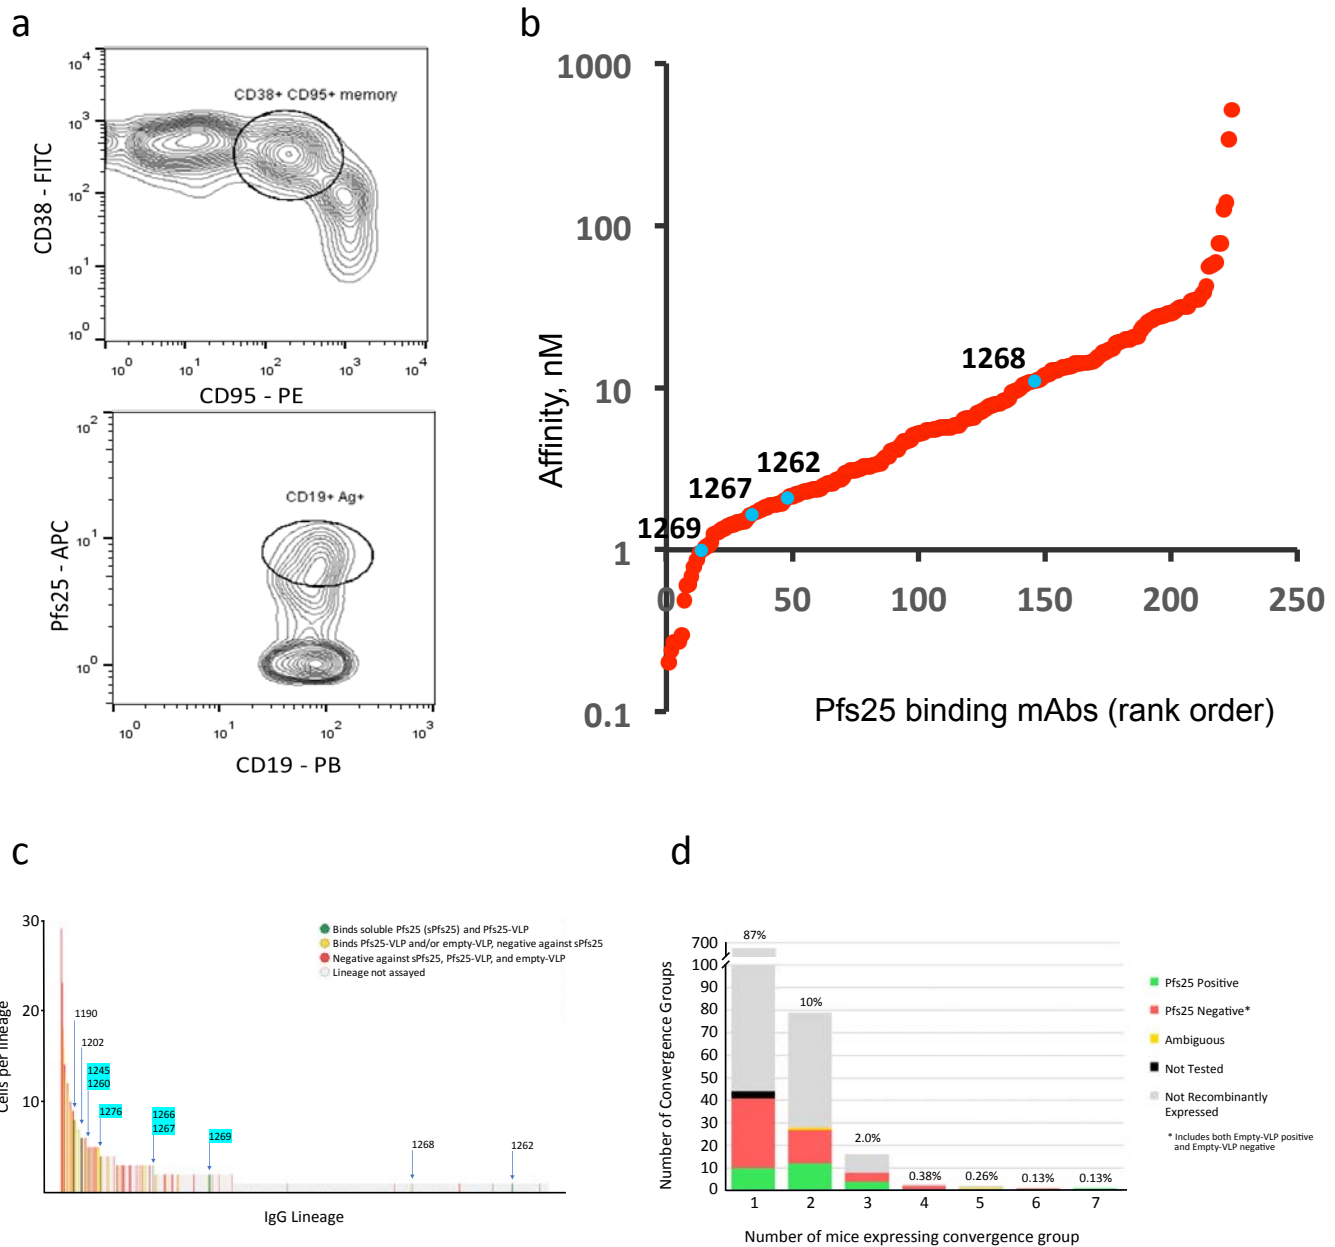

**Supplementary Figure 3. Gating strategy for antigen specific memory/GC B cells and IgG lineage analysis. (A)** The flow cytometric contour plot displaying the gating of CD38<sup>+</sup> (FITC) CD95<sup>+</sup> (PE) memory cell population after the exclusion of IgM<sup>+</sup> and IgD<sup>+</sup> B cells. Single memory B cells positive for CD19<sup>+</sup> (Pacific Blue) and antigen positive (Pfs25-APC) were then sorted into separate wells in a 96-well plate. **(B)** The binding affinity (nM) of 225 Pfs25 antigen binding antibodies assayed by SPR to surface immobilized Pfs25 antigen with the positions of antibodies 1262, 1267, 1268 and 1269 indicated in blue. Antibodies 1276, 1260 and 1266 were not expressed at sufficient quantity in this high-throughput assay format to allow SPR measurements. **(C)** Summary of ELISA results for plasmablast-derived and memory B cell-derived sequences according to their Ig lineage and the number of cells per lineage. Lineages on the x-axis are based on natively paired HC+LC sequences. Labels in blue highlight denote lineages for which both plasmablasts and memory B cells were observed. Other labels denote

lineages for which only plasmablasts or only memory B cells were observed. **(D)** Summary of ELISA results for plasmablast-derived and memory B cell-derived sequences according to the number of Kymice that share the same lineage. Lineages that appear the same, but that originate from different Kymice, together make a convergence group. The number of convergence groups is plotted against the number of Kymice in a convergence group (e.g. 87 % of IgG observed lineages occur in a single Kymouse, while 10 % of IgG lineages occur in two separate Kymice).

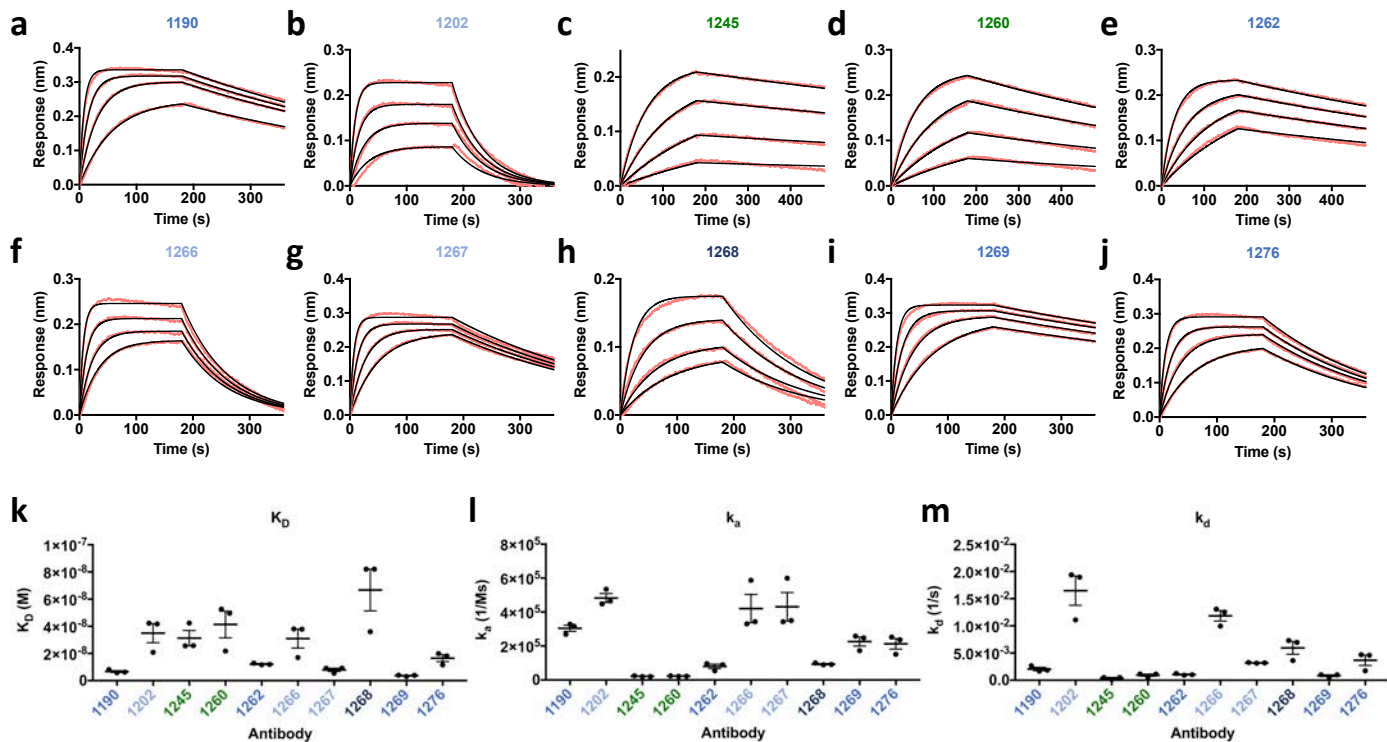

**Supplementary Figure 4. Binding kinetics of anti-Pfs25 mAbs.** (A-J) Representative sensorgrams (salmon) and 1:1 model best fits (black) for Fab binding to Pfs25, determined by biolayer interferometry. A 2-fold dilution series was used beginning at the following concentrations (A) 1190 – 400 nM, (B) 1202 – 200 nM, (C) 1245 – 800 nM, (D) 1260 – 800 nM, (E) 1262 – 400 nM, (F) 1266 – 400 nM, (G) 1267 – 400 nM, (H) 1268 – 400 nM, (I) 1269 – 400 nM, (J) 1276 – 400 nM. The (K)  $K_D$ , (L)  $k_a$  and (M)  $k_d$  for each antibody. Three independent measurements were performed (black circles) and mean and standard error of the mean (SEM) are shown. Antibodies names are colored by their respective bin from Fig. 2. If antibodies belong to two or more bins, then only one was selected for coloring.

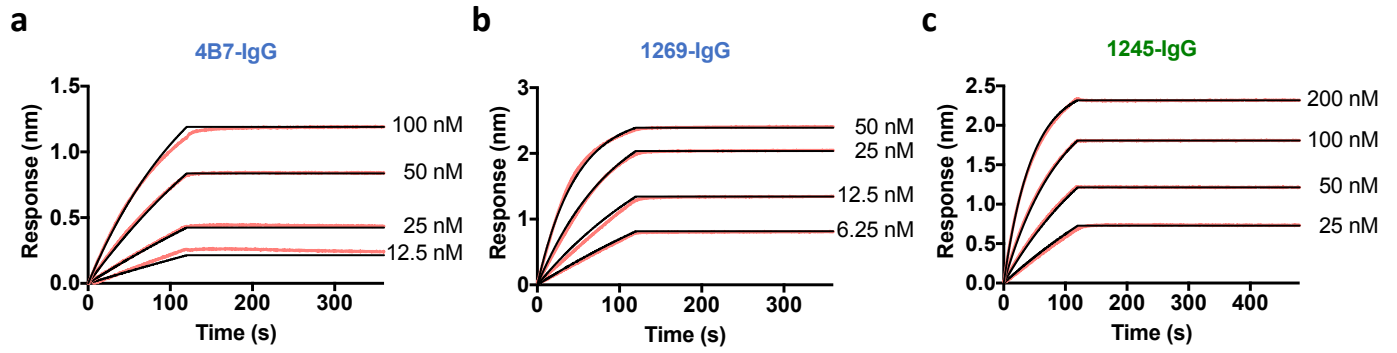

**Supplementary Figure 5. Binding kinetics of site 1 and site 2 mAbs.** Representative sensograms (salmon) and 1:1 model best fits (black) for **(A)** 4B7-IgG (control), **(B)** 1269-IgG and **(C)** 1245-IgG binding to Pfs25, determined by biolayer interferometry.



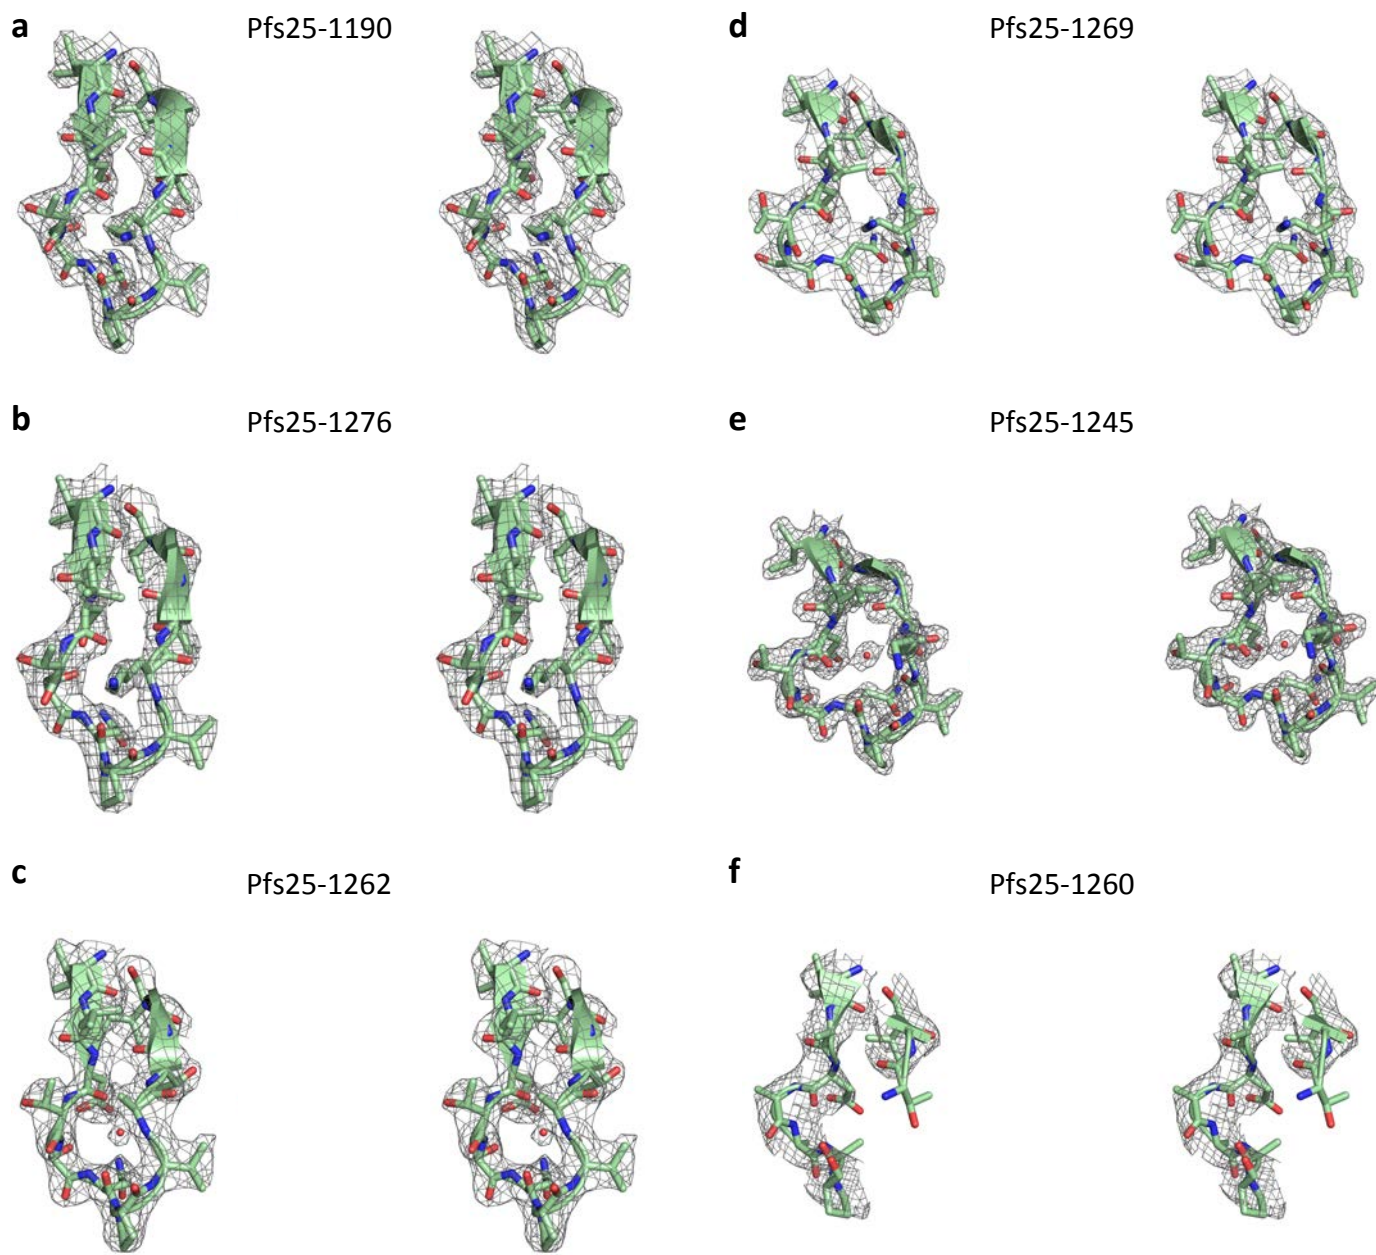

**Supplementary Figure 7. Stereo view of the conformational differences in the 4B7 loop region.** Stereo view of the 2mFo-DFc electron density map contoured at 1.0  $\sigma$  of the 4B7 loop, residues 100 to 111 of Pfs25 bound to (A) 1190, (B) 1276, (C) 1262, (D) 1269, (E) 1245 and (F) 1260. The 4B7 loop displays conformational flexibility between the crystal structures.



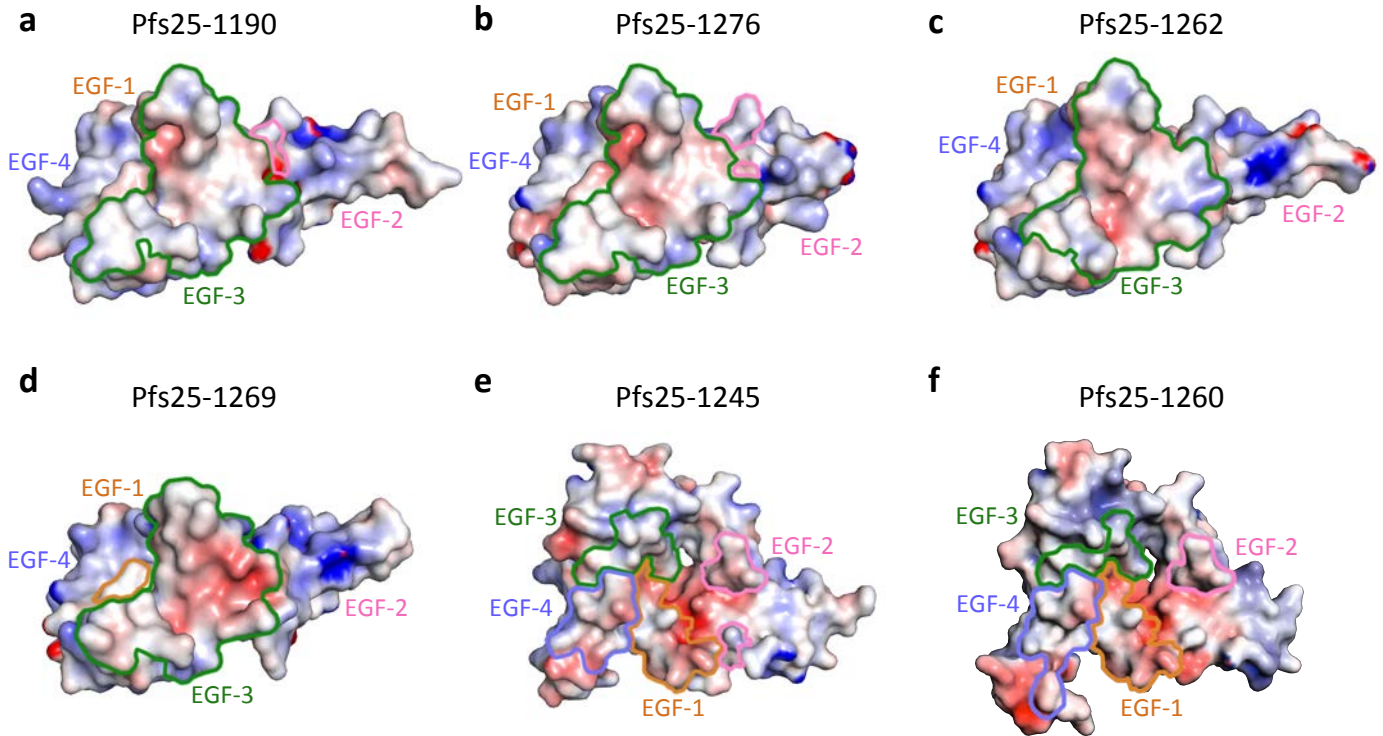

**Supplementary Figure 8. Surface electrostatics of Pfs25 antibody recognition sites.** The solvent accessible electrostatic potential is shown for (A) Pfs25-1190, (B) Pfs25-1276, (C) Pfs25-1262, (D) Pfs25-1269, (E) Pfs25-1245 and (F) Pfs25-1260. Electrostatic calculations were performed using APBS ( $\pm 5 kT/e$ )<sup>4</sup>. Antibody recognition sites are outlined and colored according to EGF-like domain (wheat – EGF-like domain 1, pink – EGF-like domain 2, green – EGF-like domain 3, blue – EGF-like domain 4).

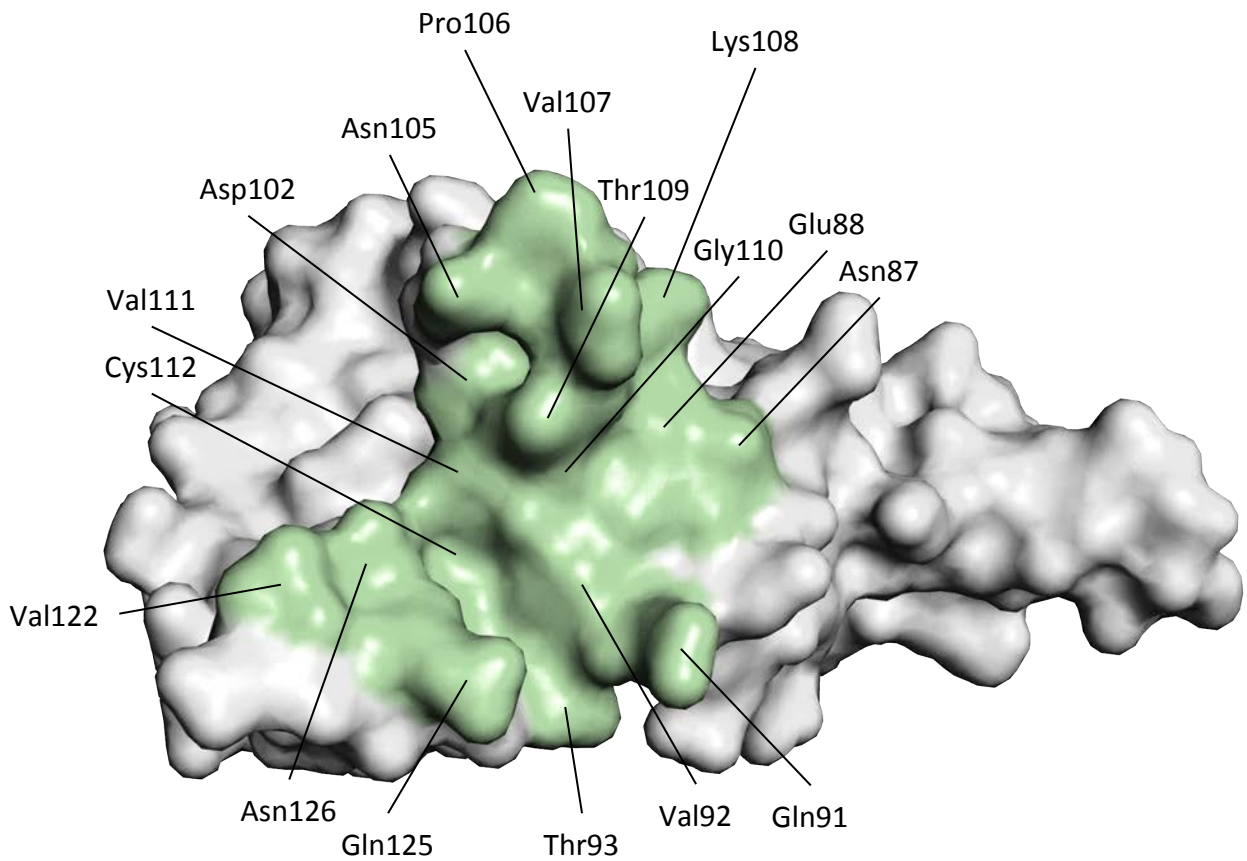

**Supplementary Figure 9. Pfs25 residues involved in recognition by site 1a mAbs.** Pfs25 is shown as a surface representation and EGF-like domain 3 residues that are contacted by 1190, 1262, 1269 and 1276 are colored green and their position labeled.

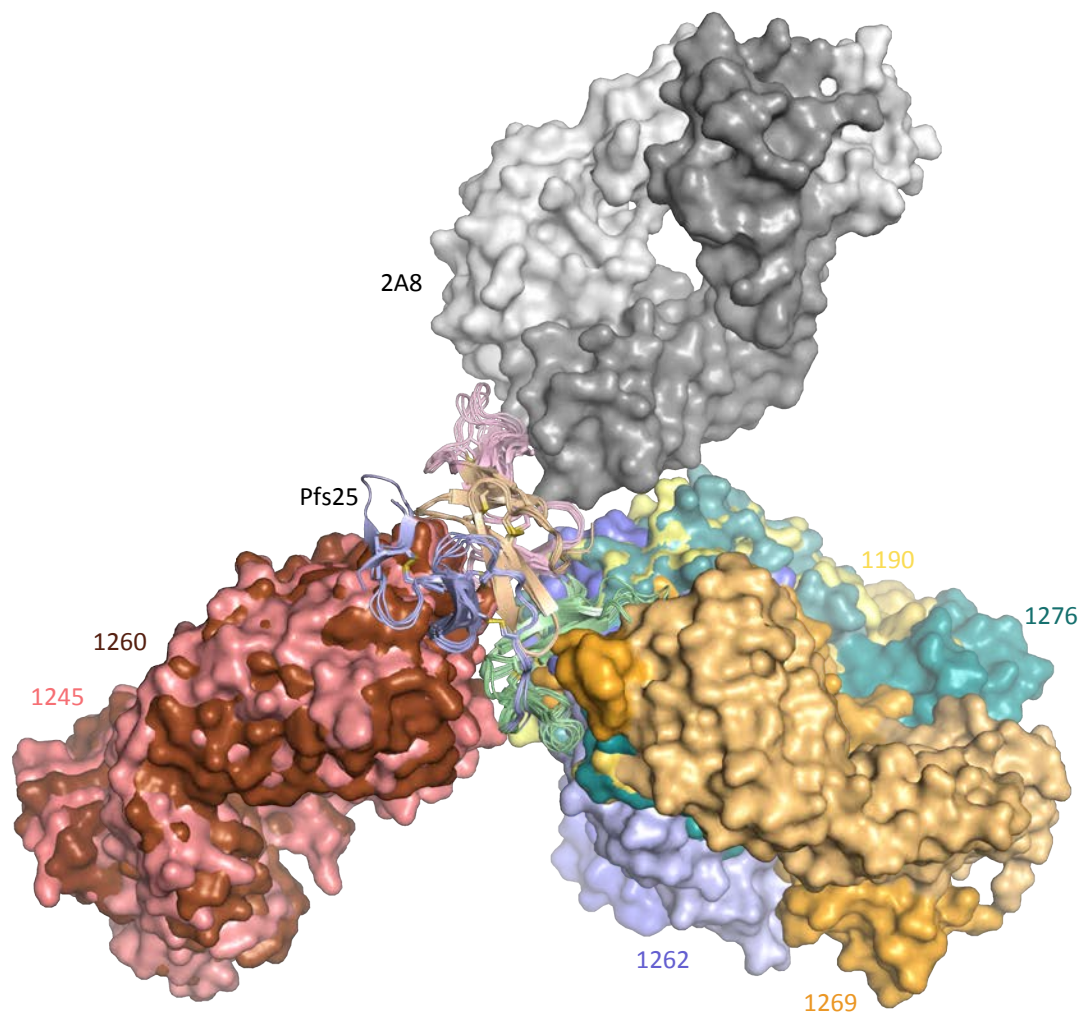

**Supplementary Figure 10. Superposition of Pfs25-Fab co-complex crystal structures with the Pvs25-2A8 crystal structure.** Pfs25-Fab crystal structures have been superposed with the Pvs25-2A8 crystal structure (PDB ID 1Z3G)<sup>3</sup>. Fabs are shown as surface representation and are colored as in Fig. 3. 2A8 is colored in grey and is shown to bind Pvs25 to a site distal to site 1 and site 2 on Pfs25.

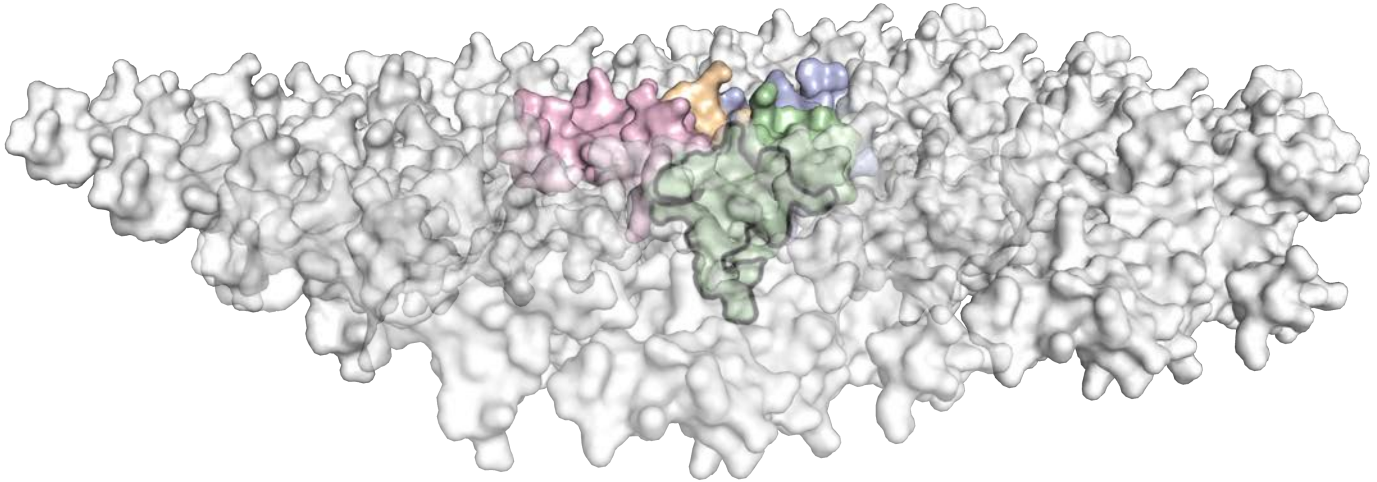

**Supplementary Figure 11. The proposed Pvs25 tile-like packing model is incompatible with Pfs25 recognition by Kymice-derived, site 1-directed mAbs.** The tile-like crystal packing present in the Pvs25 crystal structure (PDB 1Z1Y)<sup>3</sup>. The central Pvs25 molecule is colored according to EGF-like domain (wheat – EGF-like domain 1, pink – EGF-like domain 2, green – EGF-like domain 3, blue – EGF-like domain 4), while surrounding Pvs25 molecules are colored grey and are transparent to aid visibility. The interaction area of site 1a antibodies is outlined in black. While site 2 antibodies could bind to the outward facing triangular face of the proposed Ps25 tile-like arrangement, the epitopes of site 1-directed antibodies are inaccessible, making this suggested disposition of Ps25 on the surface of ookinetes unlikely for Pfs25.

**Supplementary Table 1: SMFA of mAbs tested at 375 and 10 µg/mL**

| Test mAb               | mAb conc.<br>[µg/mL] | Mean<br>oocysts | % Inhibition (%TRA) <sup>a</sup> |          |          |         |
|------------------------|----------------------|-----------------|----------------------------------|----------|----------|---------|
|                        |                      |                 | Best-estimate                    | 95%CI Lo | 95%CI Hi | p-value |
| <b><u>Assay #1</u></b> |                      |                 |                                  |          |          |         |
| Control                | N/A                  | 23.5            |                                  |          |          |         |
| 973                    | 128                  | 4.8             | 79.6                             | 42.2     | 93.3     | 0.006   |
| 981                    | 375                  | 21.6            | 8.3                              | -148.8   | 67.6     | 0.867   |
| 1185                   | 375                  | 23.4            | 0.6                              | -204.5   | 66.7     | 0.967   |
| 1189                   | 375                  | 19.6            | 16.8                             | -152.2   | 72.5     | 0.757   |
| 1190                   | 375                  | 10.8            | 54.3                             | -31.6    | 84.0     | 0.168   |
| 1192                   | 375                  | 20.6            | 12.6                             | -152.5   | 68.3     | 0.786   |
| 1195                   | 375                  | 17.3            | 26.4                             | -109.0   | 74.6     | 0.600   |
| 1198                   | 375                  | 14.5            | 38.5                             | -75.8    | 79.3     | 0.368   |
| 1199                   | 375                  | 21.4            | 8.9                              | -160.7   | 68.6     | 0.818   |
| 1202                   | 375                  | 0.3             | 98.7                             | 95.9     | 99.8     | 0.001   |
| 1203                   | 375                  | 23.2            | 1.3                              | -185.5   | 68.0     | 0.985   |
| 1207                   | 375                  | 21.8            | 7.4                              | -175.8   | 67.8     | 0.814   |
| 1223                   | 375                  | 21.4            | 8.9                              | -167.5   | 66.5     | 0.865   |
| 1224                   | 375                  | 19.3            | 18.1                             | -139.0   | 72.6     | 0.706   |
| 1226                   | 375                  | 29.2            | -24.3                            | -247.6   | 59.5     | 0.661   |
| 1230                   | 375                  | 16.3            | 30.6                             | -106.6   | 75.3     | 0.493   |
| 1231                   | 375                  | 17.6            | 25.3                             | -119.1   | 76.2     | 0.587   |
| 1243                   | 375                  | 16.8            | 28.7                             | -94.8    | 77.1     | 0.538   |
| 1244                   | 375                  | 0.0             | 100.0                            | 99.3     | 100.0    | 0.001   |
| 1245                   | 375                  | 1.6             | 93.2                             | 79.5     | 98.2     | 0.001   |
| <b><u>Assay #2</u></b> |                      |                 |                                  |          |          |         |
| Control                | N/A                  | 6.5             |                                  |          |          |         |
| 1260                   | 375                  | 0.1             | 99.2                             | 97.0     | 100.0    | 0.001   |
| 1261                   | 375                  | 0.2             | 97.7                             | 89.7     | 100.0    | 0.001   |
| 1262                   | 375                  | 0.0             | 100.0                            | 97.6     | 100.0    | 0.001   |
| 1263                   | 375                  | 0.1             | 99.2                             | 95.5     | 100.0    | 0.001   |
| 1264                   | 375                  | 0.1             | 98.4                             | 92.0     | 100.0    | 0.001   |
| 1265                   | 375                  | 0.1             | 99.2                             | 94.7     | 100.0    | 0.001   |
| 1266                   | 375                  | 0.1             | 99.2                             | 94.7     | 100.0    | 0.001   |
| 1267                   | 375                  | 0.2             | 97.7                             | 91.0     | 100.0    | 0.001   |
| 1268                   | 375                  | 0.5             | 93.0                             | 79.7     | 98.0     | 0.001   |
| 1269                   | 375                  | 0.0             | 100.0                            | 98.1     | 100.0    | 0.001   |
| 1270                   | 375                  | 0.2             | 97.7                             | 92.7     | 99.4     | 0.001   |
| 1271                   | 375                  | 0.1             | 98.4                             | 94.1     | 100.0    | 0.001   |
| 1272                   | 375                  | 0.1             | 99.2                             | 97.3     | 100.0    | 0.001   |
| 1273                   | 375                  | 0.1             | 98.4                             | 94.4     | 100.0    | 0.001   |
| 1276                   | 375                  | 0.2             | 97.7                             | 91.6     | 99.7     | 0.001   |

Assay #3

|         |     |      |       |        |      |       |
|---------|-----|------|-------|--------|------|-------|
| Control | N/A | 45.0 |       |        |      |       |
| 1202    | 10  | 70.2 | -56.1 | -342.5 | 44.9 | 0.405 |
| 1244    | 10  | 42.5 | 5.5   | -175.1 | 67.0 | 0.957 |
| 1245    | 10  | 62.7 | -39.5 | -308.8 | 52.3 | 0.528 |
| 1260    | 10  | 67.5 | -50.2 | -349.2 | 50.6 | 0.470 |
| 1261    | 10  | 84.3 | -87.5 | -432.5 | 34.8 | 0.241 |
| 1262    | 10  | 56.3 | -25.1 | -270.4 | 55.5 | 0.668 |
| 1263    | 10  | 75.5 | -67.9 | -367.8 | 41.8 | 0.351 |
| 1264    | 10  | 58.1 | -29.3 | -257.9 | 56.3 | 0.643 |
| 1265    | 10  | 56.9 | -26.5 | -250.4 | 57.0 | 0.686 |
| 1266    | 10  | 73.1 | -62.5 | -383.8 | 41.2 | 0.355 |
| 1267    | 10  | 37.2 | 17.4  | -146.5 | 73.0 | 0.752 |
| 1268    | 10  | 62.9 | -39.8 | -321.2 | 52.1 | 0.538 |
| 1269    | 10  | 55.9 | -24.4 | -252.5 | 57.3 | 0.688 |
| 1270    | 10  | 33.9 | 24.7  | -107.3 | 72.3 | 0.593 |
| 1271    | 10  | 57.3 | -27.5 | -280.8 | 57.4 | 0.670 |
| 1272    | 10  | 74.1 | -64.8 | -387.0 | 42.5 | 0.358 |
| 1273    | 10  | 56.2 | -25.0 | -256.7 | 58.2 | 0.667 |
| 1276    | 10  | 54.3 | -20.8 | -252.8 | 57.1 | 0.720 |

<sup>a</sup> The best estimate and 95%CI of % inhibition, and the p-value (whether the observed inhibition was significantly different from zero) were calculated using a zero-inflated negative binomial model<sup>5</sup>.

<sup>b</sup> Since AB1190 did not show a strong inhibition in Assay #1, the mAb was not tested at 10 µg/mL.

**Supplementary Table 2: Binding kinetics of Fabs to Pfs25.**

| <b>Fabs</b> | <b>K<sub>D</sub> (nM)</b> | <b>k<sub>a</sub> (1/Ms)</b>               | <b>k<sub>d</sub> (1/s)</b>                  |
|-------------|---------------------------|-------------------------------------------|---------------------------------------------|
| <b>1190</b> | 6.7 ± 0.7                 | 3.0×10 <sup>5</sup> ± 1.8×10 <sup>4</sup> | 2.1×10 <sup>-3</sup> ± 3.0×10 <sup>-4</sup> |
| <b>1202</b> | 35.0 ± 7.0                | 4.8×10 <sup>5</sup> ± 2.6×10 <sup>4</sup> | 1.6×10 <sup>-2</sup> ± 2.7×10 <sup>-3</sup> |
| <b>1245</b> | 31.0 ± 5.6                | 2.2×10 <sup>4</sup> ± 1.7×10 <sup>3</sup> | 3.8×10 <sup>-4</sup> ± 1.4×10 <sup>-4</sup> |
| <b>1260</b> | 41.0 ± 9.8                | 2.3×10 <sup>4</sup> ± 1.3×10 <sup>3</sup> | 9.3×10 <sup>-4</sup> ± 2.0×10 <sup>-4</sup> |
| <b>1262</b> | 12.0 ± 0.4                | 8.0×10 <sup>4</sup> ± 1.3×10 <sup>4</sup> | 1.1×10 <sup>-3</sup> ± 9.0×10 <sup>-5</sup> |
| <b>1266</b> | 31.0 ± 7.0                | 4.2×10 <sup>5</sup> ± 8.3×10 <sup>4</sup> | 1.2×10 <sup>-2</sup> ± 9.6×10 <sup>-4</sup> |
| <b>1267</b> | 7.9 ± 1.2                 | 4.3×10 <sup>5</sup> ± 8.4×10 <sup>4</sup> | 3.2×10 <sup>-3</sup> ± 4.0×10 <sup>-5</sup> |
| <b>1268</b> | 67 ± 15                   | 9.3×10 <sup>4</sup> ± 3.4×10 <sup>3</sup> | 6.0×10 <sup>-3</sup> ± 1.2×10 <sup>-3</sup> |
| <b>1269</b> | 3.7 ± 0.3                 | 2.2×10 <sup>5</sup> ± 2.7×10 <sup>4</sup> | 8.4×10 <sup>-4</sup> ± 1.6×10 <sup>-4</sup> |
| <b>1276</b> | 16.0 ± 2.5                | 2.1×10 <sup>5</sup> ± 3.1×10 <sup>4</sup> | 3.7×10 <sup>-3</sup> ± 9.6×10 <sup>-4</sup> |

**Supplementary Table 3: Data collection and refinement statistics.**

|                                                                      | Pfs25-1190       | Pfs25-1245       | Pfs25-1260       | Pfs25-1262                                    | Pfs25-1269       | Pfs25-1276       |
|----------------------------------------------------------------------|------------------|------------------|------------------|-----------------------------------------------|------------------|------------------|
| <b>Wavelength (Å)</b>                                                | 0.97949          | 0.97949          | 0.97949          | 0.97949                                       | 0.97949          | 0.97949          |
| <b>Space group</b>                                                   | P2 <sub>1</sub>  | P2 <sub>1</sub>  | P2 <sub>1</sub>  | P2 <sub>1</sub> 2 <sub>1</sub> 2 <sub>1</sub> | P2 <sub>1</sub>  | C2               |
| <b>Cell dimensions</b>                                               |                  |                  |                  |                                               |                  |                  |
| <b>a, b, c (Å)</b>                                                   | 53.6 203.1 65.5  | 51.8 83.7 76.2   | 53.2 79.6 78.1   | 65.1 119.0 165.0                              | 82.1 39.5 101.8  | 139.4 70.3 83.7  |
| <b>α, β, γ (°)</b>                                                   | 90 109.9 90      | 90 93.7 90       | 90 90.9 90       | 90 90 90                                      | 90 94.7 90       | 90 90.5 90       |
| <b>Resolution (Å)<sup>a</sup></b>                                    | 40-2.4 (2.5-2.4) | 40-1.9 (2.0-1.9) | 40-3.3 (3.4-3.3) | 47-2.7 (2.8-2.7)                              | 40-2.5 (2.6-2.5) | 40-2.2 (2.3-2.2) |
| <b>No. molecules in ASU</b>                                          | 2                | 1                | 1                | 2                                             | 1                | 1                |
| <b>No. unique observations</b>                                       | 51,230 (5,894)   | 51,093 (7,230)   | 9,926 (835)      | 36,020 (3,525)                                | 23,042 (2,539)   | 40,434 (5,096)   |
| <b>Multiplicity</b>                                                  | 3.9 (3.9)        | 3.8 (3.8)        | 3.8 (3.8)        | 7.4 (7.5)                                     | 3.7 (3.8)        | 3.1 (3.1)        |
| <b>R<sub>merge</sub> (%)<sup>b</sup></b>                             | 11.6 (55.8)      | 11.0 (58.7)      | 7.3 (60.9)       | 22.6 (110.8)                                  | 5.0 (48.6)       | 4.8 (42.1)       |
| <b>R<sub>pim</sub> (%)<sup>c</sup></b>                               | 6.8 (33.0)       | 6.5 (35.1)       | 4.4 (36.2)       | 8.9 (43.4)                                    | 3.0 (29.4)       | 3.3 (30.0)       |
| <b>&lt;I/σ I&gt;</b>                                                 | 11.5 (2.0)       | 11.8 (2.2)       | 14.6 (1.5)       | 9.7 (2.1)                                     | 17.4 (2.1)       | 16.3 (2.0)       |
| <b>CC<sub>1/2</sub></b>                                              | 99.4 (64.4)      | 99.6 (61.0)      | 99.8 (66.4)      | 98.8 (66.9)                                   | 99.9 (88.7)      | 99.8 (87.0)      |
| <b>Completeness (%)</b>                                              | 99.9 (99.9)      | 99.8 (99.8)      | 99.8 (100)       | 99.9 (100)                                    | 99.6 (99.9)      | 98.0 (99.4)      |
| <b>Refinement Statistics</b>                                         |                  |                  |                  |                                               |                  |                  |
| <b>Non-hydrogen atoms</b>                                            | 9,210            | 5,121            | 4,204            | 9,388                                         | 4,393            | 4,669            |
| <b>Macromolecule</b>                                                 | 8,740            | 4,545            | 4,204            | 8,933                                         | 4,366            | 4,476            |
| <b>Water</b>                                                         | 416              | 546              | -                | 443                                           | 15               | 169              |
| <b>Ligand</b>                                                        | 54               | 30               | -                | 12                                            | 12               | 24               |
| <b>R<sub>factor</sub><sup>d</sup> / R<sub>free</sub><sup>e</sup></b> | 19.1 / 21.7      | 16.4 / 20.0      | 23.0 / 27.9      | 18.6 / 23.8                                   | 21.7 / 24.9      | 19.1 / 23.3      |
| <b>Rms deviations from ideality</b>                                  |                  |                  |                  |                                               |                  |                  |
| <b>Bond lengths (Å)</b>                                              | 0.002            | 0.011            | 0.002            | 0.004                                         | 0.004            | 0.005            |
| <b>Bond angle (°)</b>                                                | 0.55             | 1.11             | 0.49             | 0.65                                          | 0.96             | 0.71             |
| <b>Ramachandran plot</b>                                             |                  |                  |                  |                                               |                  |                  |
| <b>Favoured regions (%)</b>                                          | 97.4             | 98.1             | 95.1             | 97.3                                          | 94.8             | 96.3             |
| <b>Allowed regions (%)</b>                                           | 2.6              | 1.9              | 4.9              | 2.7                                           | 5.2              | 3.7              |
| <b>B-factors (Å<sup>2</sup>)</b>                                     |                  |                  |                  |                                               |                  |                  |
| <b>Average B-factors</b>                                             | 46.3             | 28.1             | 136.8            | 39.2                                          | 80.5             | 64.3             |
| <b>Average macromolecule</b>                                         | 46.5             | 26.9             | 136.8            | 39.5                                          | 80.5             | 64.6             |
| <b>Average ligand</b>                                                | 55.4             | 52.1             | -                | 58.6                                          | 100.0            | 82.7             |
| <b>Average water molecule</b>                                        | 39.8             | 36.4             | -                | 32.8                                          | 60.0             | 54.2             |

<sup>a</sup> Values in parentheses refer to the highest resolution bin.

<sup>b</sup>  $R_{\text{merge}} = \frac{\sum_{\text{hkl}} \sum_i |I_{\text{hkl},i} - \langle I_{\text{hkl}} \rangle|}{\sum_{\text{hkl}} \langle I_{\text{hkl}} \rangle}$

<sup>c</sup>  $R_{\text{pim}} = \frac{\sum_{\text{hkl}} [1/(N-1)]^{1/2} \sum_i |I_{\text{hkl},i} - \langle I_{\text{hkl}} \rangle|}{\sum_{\text{hkl}} \langle I_{\text{hkl}} \rangle}$

<sup>d</sup>  $R_{\text{factor}} = \frac{(\sum |F_o| - |F_c|)}{(\sum |F_o|)}$  - for all data except as indicated in footnote e.

<sup>e</sup> 5% of data were used for the  $R_{\text{free}}$  calculation.



**Supplementary Table 4: Table of contacts between 1190 and Pfs25 ( $K_D = 6.7 \pm 0.7$  nM).**

| <b>Pfs25 Residue<br/>(BSA Å<sup>2</sup>)</b> | <b>Interaction Type</b> | <b>1190-Fab Residue</b>                                                 |
|----------------------------------------------|-------------------------|-------------------------------------------------------------------------|
| <b>Gly76 (13.13)</b>                         |                         |                                                                         |
| Gly                                          | VDW                     | L-Tyr52                                                                 |
| <b>Tyr77 (4.96)</b>                          |                         |                                                                         |
| Tyr                                          | VDW                     | L-Tyr52                                                                 |
| <b>Asn87 (75.85)</b>                         |                         |                                                                         |
| Asn                                          | VDW                     | L-Ser32, L-Tyr49, L-Tyr50, L-Asp51, L-Tyr52, L-Asp53                    |
| Asn <sup>Nδ2A</sup>                          | HB                      | L-Tyr50 <sup>O</sup>                                                    |
| Asn <sup>Nδ2B</sup>                          | HB                      | L-Tyr50 <sup>O</sup> , L-Asp51 <sup>Oδ2</sup>                           |
| <b>Glu88 (39.79)</b>                         |                         |                                                                         |
| Glu                                          | VDW                     | L-Tyr50, L-Asp53                                                        |
| <b>Lys90 (104.02)</b>                        |                         |                                                                         |
| Lys                                          | VDW                     | L-Ile28, L-Gly29, L-Ser30, L-Lys31, L-Ser32, L-Asp51, L-Asn66           |
| Lys <sup>Nζ</sup>                            | SB                      | L-Asp <sup>Oδ1</sup> , L-Asp <sup>Oδ2</sup>                             |
| Lys <sup>Nζ</sup>                            | HB                      | L-Gly29 <sup>O</sup> , L-Lys30 <sup>O</sup>                             |
| <b>Gln91 (171.09)</b>                        |                         |                                                                         |
| Gln                                          | VDW                     | L-Ser30, L-Lys31, L-Ser32, L-Trp91, L-Asp92, L-Ser93, H-Thr99, H-Ala100 |
| Gln <sup>Oε1</sup>                           | HB                      | L-Ser32 <sup>N</sup>                                                    |
| Gln <sup>Oε1</sup>                           | WMHB                    | L-Ser32 <sup>O</sup> , L-Trp91 <sup>N</sup>                             |
| Gln <sup>Nε2</sup>                           | HB                      | L-Trp91 <sup>O</sup> , L-Ser32 <sup>Oγ</sup>                            |
| <b>Val92 (33.39)</b>                         |                         |                                                                         |
| Val                                          | VDW                     | H-Thr98, H-Thr99                                                        |
| <b>Thr93 (2.57)</b>                          |                         |                                                                         |
| Thr                                          | VDW                     | H-Thr99                                                                 |
| <b>Asp102 (19.63)</b>                        |                         |                                                                         |
| Asp                                          | VDW                     | H-Arg96                                                                 |
| Asp <sup>Oδ2</sup>                           | SB                      | H-Arg96 <sup>Nε</sup>                                                   |
| <b>Asn105 (55.21)</b>                        |                         |                                                                         |
| Asn                                          | VDW                     | H-Tyr32, H-Arg94, H-Asp101                                              |
| Asn <sup>Oδ1</sup>                           | HB                      | H-Arg94 <sup>Nη2</sup>                                                  |
| Asn <sup>Nδ2</sup>                           | HB                      | H-Tyr32 <sup>OH</sup>                                                   |
| <b>Pro106 (40.23)</b>                        |                         |                                                                         |
| Pro                                          | VDW                     | L-Tyr49, L-Ser56, H-Tyr102                                              |
| <b>Val107 (118.15)</b>                       |                         |                                                                         |
| Val                                          | VDW                     | L-Leu46, L-Tyr49, L-Pro55, H-Pro100B, H-Asp101                          |
| <b>Lys108 (45.33)</b>                        |                         |                                                                         |
| Lys                                          | VDW                     | L-Tyr49, L-Tyr50, L-Asp53, H-Pro100B                                    |
| Lys <sup>N</sup>                             | HB                      | L-Tyr49 <sup>OH</sup>                                                   |
| <b>Thr109 (64.78)</b>                        |                         |                                                                         |

|                        |      |                                                                          |
|------------------------|------|--------------------------------------------------------------------------|
| Thr                    | VDW  | L-Tyr50, H-Arg96, H-Thr98, H-Ala100A, H-Pro100B                          |
| <b>Gly110 (17.84)</b>  |      |                                                                          |
| Gly                    | VDW  | L-Tyr50, H-Thr98, H-Thr99                                                |
| Gly <sup>N</sup>       | HB   | L-Tyr50 <sup>OH</sup>                                                    |
| Gly <sup>O</sup>       | HB   | H-Thr98 <sup>Oγ1</sup>                                                   |
| Gly <sup>O</sup>       | WMHB | L-Tyr50 <sup>OH</sup>                                                    |
| <b>Val111 (36.32)</b>  |      |                                                                          |
| Val                    | VDW  | H-Arg96, H-Ile97, H-Thr98                                                |
| <b>Cys112 (1.27)</b>   |      |                                                                          |
| Cys                    | VDW  | H-Thr98                                                                  |
| <b>Val122 (85.00)</b>  |      |                                                                          |
| Val                    | VDW  | H-Thr30, H-Tyr32, H-Asn52, H-Asn53, H-Ile97                              |
| Val <sup>O</sup>       | HB   | H-Asn52 <sup>Nδ2</sup>                                                   |
| <b>Gln123 (52.45)</b>  |      |                                                                          |
| Gln                    | VDW  | H-Asn52, H-Thr53, H-Asp54                                                |
| Gln <sup>Nε2</sup>     | HB   | H-Asp54 <sup>Oδ1</sup>                                                   |
| <b>Gln125 (149.32)</b> |      |                                                                          |
| Gln                    | VDW  | L-Trp91, L-His95B, H-Tyr33, H-Trp50, H-Ile97, H-Thr98, H-Thr99, H-Ala100 |
| Gln <sup>Nε2</sup>     | HB   | H-Thr98 <sup>O</sup>                                                     |
| <b>Asn126 (51.34)</b>  |      |                                                                          |
| Asn                    | VDW  | H-Arg96, H-Ile97, H-Thr98                                                |
| Asn <sup>Nδ2</sup>     | HB   | H-Ile97 <sup>O</sup>                                                     |
| Asn <sup>Nδ2</sup>     | WMHB | H-Asp31 <sup>Oδ2</sup>                                                   |
| <b>Lys127 (9.72)</b>   |      |                                                                          |
| Lys                    | VDW  | H-Thr99                                                                  |

**Supplementary Table 5: Table of contacts between 1276 and Pfs25 ( $K_D = 16.0 \pm 2.5$  nM).**

| <b>Pfs25 Residue<br/>(BSA Å<sup>2</sup>)</b> | <b>Interaction Type</b> | <b>1276-Fab Residue</b>                                                 |
|----------------------------------------------|-------------------------|-------------------------------------------------------------------------|
| <b>Leu75 (11.52)</b>                         |                         |                                                                         |
| Leu                                          | VDW                     | L-Phe52                                                                 |
| <b>Gly76 (11.75)</b>                         |                         |                                                                         |
| Gly                                          | VDW                     | L-Phe52                                                                 |
| <b>Asp78 (10.92)</b>                         |                         |                                                                         |
| Asp                                          | VDW                     | L-Asp51, L-Phe52                                                        |
| <b>Asn87 (65.57)</b>                         |                         |                                                                         |
| Asn                                          | VDW                     | L-Ser32, L-Tyr50, L-Asp51, L-Phe52, L-Asp53                             |
| Asn <sup>Nδ2</sup>                           | HB                      | L-Tyr50 <sup>O</sup>                                                    |
| Asn <sup>Nδ2</sup>                           | HB                      | L-Asp53 <sup>Oδ1</sup>                                                  |
| <b>Glu88 (41.74)</b>                         |                         |                                                                         |
| Glu                                          | VDW                     | L-Ser32, L-Tyr50, L-Asp53                                               |
| <b>Lys90 (95.17)</b>                         |                         |                                                                         |
| Lys                                          | VDW                     | L-Gly29, L-Ser30, L-Lys31, L-Ser32, L-Asp51, L-Asn66                    |
| Lys <sup>Nζ</sup>                            | SB                      | L-Asp <sup>Oδ1</sup> , L-Asp <sup>Oδ2</sup>                             |
| Lys <sup>Nζ</sup>                            | HB                      | L-Gly29 <sup>O</sup>                                                    |
| <b>Gln91 (167.22)</b>                        |                         |                                                                         |
| Gln                                          | VDW                     | L-Ser30, L-Lys31, L-Ser32, L-Trp91, L-Asp92, L-Ser93, H-Thr99, H-Ala100 |
| Gln <sup>Oε1</sup>                           | HB                      | L-Ser32 <sup>N</sup>                                                    |
| Gln <sup>Oε1</sup>                           | WMHB                    | L-Ser32 <sup>O</sup> , L-Trp91 <sup>N</sup>                             |
| Gln <sup>Nε2</sup>                           | HB                      | L-Trp91 <sup>O</sup>                                                    |
| <b>Val92 (37.47)</b>                         |                         |                                                                         |
| Val                                          | VDW                     | H-Thr98, H-Thr99                                                        |
| <b>Thr93 (2.34)</b>                          |                         |                                                                         |
| Thr                                          | VDW                     | H-Thr99                                                                 |
| <b>Asp102 (8.76)</b>                         |                         |                                                                         |
| Asp                                          | VDW                     | H-Arg96                                                                 |
| <b>Asn105 (50.17)</b>                        |                         |                                                                         |
| Asn                                          | VDW                     | H-Tyr32, H-Arg94, H-Asp101                                              |
| Asn <sup>Oδ1</sup>                           | HB                      | H-Arg94 <sup>Nη2</sup>                                                  |
| Asn <sup>Nδ2</sup>                           | HB                      | H-Tyr32 <sup>OH</sup>                                                   |
| <b>Pro106 (31.85)</b>                        |                         |                                                                         |
| Pro                                          | VDW                     | L-Tyr49                                                                 |
| Pro <sup>O</sup>                             | HB                      | L-Tyr49 <sup>OH</sup>                                                   |
| <b>Val107 (118.44)</b>                       |                         |                                                                         |
| Val                                          | VDW                     | L-Leu46, L-Tyr49, L-Pro55, H-Pro100B, H-Asp101                          |
| <b>Lys108 (42.81)</b>                        |                         |                                                                         |
| Lys                                          | VDW                     | L-Tyr49, L-Tyr50, L-Asp53, H-Pro100B                                    |

|                        |      |                                                                         |
|------------------------|------|-------------------------------------------------------------------------|
| Lys <sup>N</sup>       | HB   | L-Tyr49 <sup>OH</sup>                                                   |
| <b>Thr109 (64.86)</b>  |      |                                                                         |
| Thr                    | VDW  | L-Tyr50, H-Arg96, H-Thr98, H-Ala100A, H-Pro100B                         |
| <b>Gly110 (22.3)</b>   |      |                                                                         |
| Gly                    | VDW  | L-Tyr50, H-Thr98, H-Thr99                                               |
| Gly <sup>N</sup>       | HB   | L-Tyr50 <sup>OH</sup>                                                   |
| Gly <sup>O</sup>       | HB   | H-Thr98 <sup>Oγ1</sup>                                                  |
| Gly <sup>O</sup>       | WMHB | L-Tyr50 <sup>OH</sup>                                                   |
| <b>Val111 (32.44)</b>  |      |                                                                         |
| Val                    | VDW  | H-Arg96, H-Thr98,                                                       |
| <b>Cys112 (2.55)</b>   |      |                                                                         |
| Cys                    | VDW  | H-Thr98                                                                 |
| <b>Val122 (81.63)</b>  |      |                                                                         |
| Val                    | VDW  | H-Thr30, H-Tyr32, H-Asn52, H-Asn53, H-Ile97                             |
| Val <sup>O</sup>       | HB   | H-Asn52 <sup>Nδ2</sup>                                                  |
| <b>Gln123 (43.02)</b>  |      |                                                                         |
| Gln                    | VDW  | H-Asn52, H-Ser54                                                        |
| <b>Gln125 (149.07)</b> |      |                                                                         |
| Gln                    | VDW  | L-Trp91, L-Arg95, H-Tyr33, H-Trp50, H-Ile97, H-Thr98, H-Thr99, H-Ala100 |
| Gln <sup>Oε1</sup>     | HB   | H-Thr99 <sup>Oγ1</sup>                                                  |
| <b>Asn126 (47.77)</b>  |      |                                                                         |
| Asn                    | VDW  | H-Arg96, H-Ile97, H-Thr98                                               |
| Asn <sup>Nδ2</sup>     | HB   | H-Ile97 <sup>O</sup>                                                    |
| <b>Lys127 (11.38)</b>  |      |                                                                         |
| Lys                    | VDW  | H-Thr99                                                                 |

**Supplementary Table 6: Table of contacts between 1262 and Pfs25 ( $K_D = 12.0 \pm 0.4$  nM).**

| <b>Pfs25 Residue<br/>(BSA Å<sup>2</sup>)</b> | <b>Interaction Type</b> | <b>1262-Fab Residue</b>                                                                         |
|----------------------------------------------|-------------------------|-------------------------------------------------------------------------------------------------|
| <b>Asn87 (57.45)</b>                         |                         |                                                                                                 |
| Asn                                          | VDW                     | H-His33, H-Trp34                                                                                |
| <b>Glu88 (42.21)</b>                         |                         |                                                                                                 |
| Glu                                          | VDW                     | H-Trp34, H-Arg97, H-Phe98                                                                       |
| <b>Lys90 (68.23)</b>                         |                         |                                                                                                 |
| Lys                                          | VDW                     | H-Ser30, H-Ser31, H-Ser32, H-His33,<br>H-Leu53                                                  |
| <b>Gln91 (63.88)</b>                         |                         |                                                                                                 |
| Gln                                          | VDW                     | H-Ser31, H-Ser32, H-Arg94                                                                       |
| Gln <sup>Nε2</sup>                           | HB                      | H-Ser31 <sup>O</sup>                                                                            |
| <b>Val92 (31.84)</b>                         |                         |                                                                                                 |
| Val                                          | VDW                     | H-Phe98                                                                                         |
| <b>Thr93 (3.27)</b>                          |                         |                                                                                                 |
| Thr                                          | VDW                     | H-Phe98                                                                                         |
| <b>Asp102 (11.30)</b>                        |                         |                                                                                                 |
| Asp                                          | VDW                     | L-Tyr32                                                                                         |
| Asp <sup>Oδ2</sup>                           | HB                      | L-Tyr32 <sup>OH</sup>                                                                           |
| <b>Asn105 (64.13)</b>                        |                         |                                                                                                 |
| Asn                                          | VDW                     | L-Ile29, L-Asn30, L-Tyr32, L-Asn92                                                              |
| Asn <sup>Oδ1</sup>                           | HB                      | L-Asn30 <sup>Nδ2</sup> , L-Asn92 <sup>Nδ2</sup>                                                 |
| <b>Pro106 (34.57)</b>                        |                         |                                                                                                 |
| Pro                                          | VDW                     | L-Asn92, L-Ser93                                                                                |
| <b>Val107 (118.89)</b>                       |                         |                                                                                                 |
| Val                                          | VDW                     | L-Leu91, L-Asn92, L-Ser93, L-Tyr94,<br>H-Arg97, H-Ala100A                                       |
| Val <sup>N</sup>                             | HB                      | L-Asn92 <sup>O</sup>                                                                            |
| <b>Lys108 (9.46)</b>                         |                         |                                                                                                 |
| Lys                                          | VDW                     | H-Arg97                                                                                         |
| <b>Thr109 (59.51)</b>                        |                         |                                                                                                 |
| Thr                                          | VDW                     | L-Tyr32, H-Arg97, H-Phe98 H-Tyr99,<br>H-Gly100                                                  |
| Thr <sup>Oγ1</sup>                           | HB                      | H-Arg97 <sup>O</sup> , H-Tyr99 <sup>N</sup> , H-Gly100 <sup>N</sup> , H-<br>Gly100 <sup>O</sup> |
| <b>Gly110 (23.54)</b>                        |                         |                                                                                                 |
| Gly                                          | VDW                     | H-Arg97, H-Phe98, H-Tyr99                                                                       |
| Gly <sup>N</sup>                             | HB                      | H-Arg97 <sup>O</sup>                                                                            |
| Gly <sup>O</sup>                             | HB                      | H-Tyr99 <sup>N</sup>                                                                            |
| <b>Val111 (46.10)</b>                        |                         |                                                                                                 |
| Val                                          | VDW                     | L-Tyr32, H-Phe98, H-Tyr99                                                                       |
| <b>Cys112 (11.13)</b>                        |                         |                                                                                                 |
| Cys                                          | VDW                     | H-Phe98, H-Tyr99                                                                                |
| Cys <sup>N</sup>                             | HB                      | H-Tyr99 <sup>OH</sup>                                                                           |

|                        |     |                                                         |
|------------------------|-----|---------------------------------------------------------|
| Cys <sup>O</sup>       | HB  | H-Tyr99 <sup>OH</sup>                                   |
| <b>Pro120 (9.37)</b>   |     |                                                         |
| Pro                    | VDW | H-Tyr99                                                 |
| <b>Val122 (62.27)</b>  |     |                                                         |
| Val                    | VDW | L-Ser52, L-Thr53, L-Leu54                               |
| <b>Gln125 (106.13)</b> |     |                                                         |
| Gln                    | VDW | L-Tyr49, L-Thr53, L-Leu54, L-Gln55,<br>L-Ser56, H-Phe98 |
| Gln <sup>Nε2</sup>     | HB  | L-Leu54 <sup>O</sup>                                    |
| <b>Asn126 (79.93)</b>  |     |                                                         |
| Asn                    | VDW | L-Tyr49, L-Ala50, L-Thr53, H-Phe98,<br>H-Tyr99          |
| Asn <sup>Oδ1</sup>     | HB  | L-Thr53 <sup>Oγ1</sup>                                  |

**Supplementary Table 7: Table of contacts between 1269 and Pfs25 ( $K_D = 3.7 \pm 0.3$  nM).**

| <b>Pfs25 Residue<br/>(BSA Å<sup>2</sup>)</b> | <b>Interaction Type</b> | <b>1269-Fab Residue</b>                                                  |
|----------------------------------------------|-------------------------|--------------------------------------------------------------------------|
| <b>Ser18 (16.62)</b>                         |                         |                                                                          |
| Ser                                          | VDW                     | H-Phe99, H-Tyr100D                                                       |
| <b>Gly19 (35.43)</b>                         |                         |                                                                          |
| Gly                                          | VDW                     | H-Tyr100D                                                                |
| <b>Asn87 (43.94)</b>                         |                         |                                                                          |
| Asn                                          | VDW                     | H-Ser53, H-Asp55                                                         |
| Asn <sup>Nδ2</sup>                           | HB                      | H-Ser53 <sup>Oγ</sup> , H-Asp55 <sup>Oδ2</sup>                           |
| <b>Glu88 (58.73)</b>                         |                         |                                                                          |
| Glu                                          | VDW                     | H-Ser52, H-Gly52A, H-Ser53, H-Gly54,<br>H-Asp55, H-Ser56                 |
| Glu <sup>Oε1</sup>                           | HB                      | H-Gly52A <sup>N</sup> , H-Ser53 <sup>N</sup>                             |
| Glu <sup>Oε2</sup>                           | HB                      | H-Ser52 <sup>Oγ1</sup> , H-Ser53 <sup>Oγ1</sup> , H-Ser56 <sup>Oγ1</sup> |
| <b>Gln91 (90.94)</b>                         |                         |                                                                          |
| Gln                                          | VDW                     | H-Thr28, H-Ser30, H-Arg31, H-Gly52A,<br>H-Ser53, H-Asn73                 |
| <b>Val92 (34.13)</b>                         |                         |                                                                          |
| Val                                          | VDW                     | H-Arg31                                                                  |
| <b>Thr93 (9.51)</b>                          |                         |                                                                          |
| Thr                                          | VDW                     | H-Arg31                                                                  |
| Thr <sup>O</sup>                             | HB                      | H-Arg31 <sup>Nη2</sup>                                                   |
| <b>Ile100 (3.68)</b>                         |                         |                                                                          |
| Ile                                          | VDW                     | H-Tyr100D                                                                |
| <b>Asp102 (32.89)</b>                        |                         |                                                                          |
| Asp                                          | VDW                     | L-Tyr32, H-Tyr100D, H-Phe100F                                            |
| Asp <sup>Oδ1</sup>                           | HB                      | L-Tyr32 <sup>OH</sup>                                                    |
| <b>Ser104 (26.34)</b>                        |                         |                                                                          |
| Ser                                          | VDW                     | L-Tyr32                                                                  |
| <b>Asn105 (52.06)</b>                        |                         |                                                                          |
| Asn                                          | VDW                     | L-Tyr32, L-Tyr91, H-Phe100F                                              |
| <b>Pro106 (83.01)</b>                        |                         |                                                                          |
| Pro                                          | VDW                     | L-Tyr32, L-Gln90, L-Tyr91, H-Tyr58                                       |
| <b>Val107 (101.94)</b>                       |                         |                                                                          |
| Val                                          | VDW                     | L-Tyr91, L-Gly92, H-Ala33, H-Thr50,<br>H-Tyr58                           |
| <b>Lys108 (47.52)</b>                        |                         |                                                                          |
| Lys                                          | VDW                     | H-Ser52, H-Gly52A, H-Ser56, H-Tyr58                                      |
| Lys <sup>N</sup>                             | HB                      | H-Tyr58 <sup>OH</sup>                                                    |
| <b>Thr109 (41.45)</b>                        |                         |                                                                          |
| Thr                                          | VDW                     | L-Tyr91, H-Phe100F                                                       |
| <b>Gly110 (11.21)</b>                        |                         |                                                                          |
| Gly                                          | VDW                     | H-Arg31, H-Tyr97                                                         |
| <b>Val111 (53.68)</b>                        |                         |                                                                          |

|                        |     |                                               |
|------------------------|-----|-----------------------------------------------|
| Val                    | VDW | H-Tyr97, H-Tyr100D, H-Phe100F                 |
| <b>Cys112 (12.76)</b>  |     |                                               |
| Cys                    | VDW | H-Arg31, H-Tyr97, H-Tyr100D                   |
| Cys <sup>N</sup>       | HB  | H-Tyr97 <sup>OH</sup>                         |
| Cys <sup>O</sup>       | HB  | H-Tyr100D <sup>OH</sup>                       |
| <b>Ser113 (0.69)</b>   |     |                                               |
| Ser                    | VDW | H-Tyr100D                                     |
| <b>Val119 (18.47)</b>  |     |                                               |
| Val                    | VDW | H-Phe99                                       |
| <b>Pro120 (50.04)</b>  |     |                                               |
| Pro                    | VDW | H-Tyr97, H-Phe99, H-Tyr100D                   |
| <b>Val122 (76.54)</b>  |     |                                               |
| Val                    | VDW | L-Tyr49, L-Thr56, H-Tyr97, H-Tyr98,           |
| <b>Gln123 (128.84)</b> |     |                                               |
| Gln                    | VDW | L-Thr56                                       |
| Gln <sup>Nε2</sup>     | HB  | L-Thr56 <sup>Oγ1</sup>                        |
| <b>Gln125 (99.08)</b>  |     |                                               |
| Gln                    | VDW | H-Phe27, H-Thr28, H-Arg31, H-Asn32            |
| Gln <sup>O</sup>       | HB  | H-Arg31 <sup>Nη2</sup>                        |
| Gln <sup>Oε1</sup>     | HB  | H-Thr28 <sup>N</sup>                          |
| Gln <sup>Nε2</sup>     | HB  | H-Thr28 <sup>Oγ1</sup>                        |
| <b>Asn126 (72.93)</b>  |     |                                               |
| Asn                    | VDW | H-Arg31, H-Asp96, H-Tyr97, H-Tyr98            |
| Asn <sup>O</sup>       | HB  | H-Tyr97 <sup>OH</sup>                         |
| Asn <sup>Nδ2</sup>     | HB  | H-Asp96 <sup>Oδ2</sup> , H-Tyr97 <sup>O</sup> |
| <b>Lys127 (7.60)</b>   |     |                                               |
| Lys                    | VDW | H-Arg31                                       |



**Supplementary Table 8: Table of contacts between 1245 and Pfs25 ( $K_D = 31.0 \pm 5.6$  nM).**

| <b>Pfs25 Residue<br/>(BSA Å<sup>2</sup>)</b> | <b>Interaction Type</b> | <b>1245-Fab Residue</b>             |
|----------------------------------------------|-------------------------|-------------------------------------|
| <b>Phe13 (31.08)</b>                         |                         |                                     |
| Phe                                          | VDW                     | H-Tyr100A, H-Tyr100C                |
| <b>Ile15 (12.72)</b>                         |                         |                                     |
| Ile                                          | VDW                     | H-Tyr100C, H-Tyr100D                |
| <b>Met17 (10.48)</b>                         |                         |                                     |
| Met                                          | VDW                     | H-Tyr100D                           |
| <b>Glu22 (12.87)</b>                         |                         |                                     |
| Glu                                          | VDW                     | H-Tyr100D                           |
| Glu <sup>oe2</sup>                           | HB                      | H-Tyr100D <sup>OH</sup>             |
| <b>Lys24 (56.33)</b>                         |                         |                                     |
| Lys                                          | VDW                     | H-Tyr100C, H-Arg100B, H-Tyr100A     |
| Lys <sup>Nζ</sup>                            | HB                      | H-Arg100B <sup>O</sup>              |
| Lys <sup>Nζ</sup>                            | WMHB                    | L-Asp28 <sup>Oδ2</sup>              |
| <b>Cys25 (4.48)</b>                          |                         |                                     |
| Cys                                          | VDW                     | H-Tyr100A                           |
| <b>Glu26 (7.28)</b>                          |                         |                                     |
| Glu                                          | VDW                     | H-Tyr100A                           |
| <b>Asn27 (21.20)</b>                         |                         |                                     |
| Asn                                          | VDW                     | H-Tyr100A                           |
| Asn <sup>N</sup>                             | HB                      | H-Tyr100A <sup>OH</sup>             |
| <b>Asp28 (16.73)</b>                         |                         |                                     |
| Asp                                          | VDW                     | L-Ser27E                            |
| <b>Lys40 (33.97)</b>                         |                         |                                     |
| Lys                                          | VDW                     | L-Ser27E                            |
| Lys <sup>Nζ</sup>                            | HB                      | L-Ser27E <sup>O</sup>               |
| <b>Asn81 (7.45)</b>                          |                         |                                     |
| Asn                                          | VDW                     | L-Gly29                             |
| Asn <sup>O</sup>                             | WMHB                    | L-Asn30 <sup>Oδ1</sup>              |
| <b>Asn82 (48.42)</b>                         |                         |                                     |
| Asn                                          | VDW                     | L-Gly29, L-Asp28, L-Val27C, L-Thr31 |
| Asn <sup>Oδ1</sup>                           | WMHB                    | L-Thr31 <sup>Oγ1</sup>              |
| <b>Val83 (40.58)</b>                         |                         |                                     |
| Val                                          | VDW                     | L-Asn30, L-Asp28, L-Gly29           |
| <b>Gly95 (23.4)</b>                          |                         |                                     |
| Gly                                          | VDW                     | L-Tyr49                             |
| Gly <sup>O</sup>                             | HB                      | L-Tyr49 <sup>OH</sup>               |
| Gly <sup>O</sup>                             | WMHB                    | H-Tyr100D <sup>O</sup>              |
| <b>Asn96 (6.93)</b>                          |                         |                                     |
| Asn                                          | VDW                     | L-Tyr49                             |
| <b>Gly97 (12.02)</b>                         |                         |                                     |
| Gly                                          | VDW                     | H-Tyr100D                           |
| Gly <sup>O</sup>                             | WMHB                    | H-Tyr100D <sup>O</sup>              |

|                                      |      |                                                                              |
|--------------------------------------|------|------------------------------------------------------------------------------|
| <b>Lys98 (29.29)</b>                 |      |                                                                              |
| Lys                                  | VDW  | H-Tyr100D                                                                    |
| Lys <sup>N<math>\zeta</math></sup>   | HB   | H-Tyr100D <sup>OH</sup>                                                      |
| <b>Asn115 (38.10)</b>                |      |                                                                              |
| Asn                                  | VDW  | H-Tyr100D, H-Tyr100E                                                         |
| Asn <sup>N<math>\delta</math>2</sup> | HB   | H-Tyr100D <sup>O</sup>                                                       |
| Asn <sup>O<math>\delta</math>1</sup> | WMHB | H-Tyr100D <sup>N</sup>                                                       |
| <b>Ile116 (5.26)</b>                 |      |                                                                              |
| Ile                                  | VDW  | H-Tyr32                                                                      |
| <b>Lys148 (17.60)</b>                |      |                                                                              |
| Lys                                  | VDW  | H-Tyr53                                                                      |
| <b>Ala149 (35.84)</b>                |      |                                                                              |
| Ala                                  | VDW  | H-Tyr53, H-Ser31, H-Thr30                                                    |
| Ala <sup>O</sup>                     | HB   | H-Ser31 <sup>O<math>\gamma</math></sup>                                      |
| <b>Val150 (66.47)</b>                |      |                                                                              |
| Val                                  | VDW  | H-Tyr53, H-Ser31, H-Tyr100C, H-Asp98, H-Gly97                                |
| <b>Asp151 (134.57)</b>               |      |                                                                              |
| Asp                                  | VDW  | H-Ser31, H-Tyr32, H-Tyr100C, H-Tyr100E, H-Tyr100D, H-Asp98, H-Gly97, H-Arg96 |
| Asp <sup>N</sup>                     | HB   | H-Ser31 <sup>O</sup>                                                         |
| Asp <sup>O<math>\delta</math>1</sup> | HB   | H-Gly97 <sup>N</sup>                                                         |
| Asp <sup>O<math>\delta</math>2</sup> | HB   | H-Asp98 <sup>N</sup>                                                         |
| Asp <sup>O<math>\delta</math>2</sup> | WMHB | H-Arg96 <sup>N<math>\epsilon</math></sup> , H-Tyr100A <sup>O</sup>           |
| <b>Gly152 (15.96)</b>                |      |                                                                              |
| Gly                                  | VDW  | H-Tyr32, H-Tyr100E                                                           |
| Gly <sup>N</sup>                     | HB   | H-Tyr32 <sup>OH</sup>                                                        |
| <b>Ile153 (26.44)</b>                |      |                                                                              |
| Ile                                  | VDW  | H-Tyr100C, H-Tyr100D                                                         |
| <b>Lys155 (31.97)</b>                |      |                                                                              |
| Lys                                  | VDW  | H-Tyr53, H-Tyr100C, H-Tyr100A, H-Asp98                                       |
| Lys <sup>N<math>\zeta</math></sup>   | HB   | H-Tyr100C <sup>OH</sup>                                                      |
| Lys <sup>N<math>\zeta</math></sup>   | SB   | H-Asp98 <sup>O<math>\delta</math>2</sup>                                     |
| <b>Asp157 (17.90)</b>                |      |                                                                              |
| Asp                                  | VDW  | H-Tyr53                                                                      |
| Asp <sup>O<math>\delta</math>2</sup> | HB   | H-Tyr53 <sup>OH</sup>                                                        |

**Supplementary Table 9: Table of contacts between 1260 and Pfs25 ( $K_D = 41.0 \pm 9.8$  nM).**

| <b>Pfs25 Residue<br/>(BSA Å<sup>2</sup>)</b> | <b>Interaction Type</b> | <b>1260-Fab Residue</b>   |
|----------------------------------------------|-------------------------|---------------------------|
| <b>Phe13 (32.28)</b>                         |                         |                           |
| Phe                                          | VDW                     | H-Tyr100A, H-Tyr100C      |
| <b>Ile15 (15.57)</b>                         |                         |                           |
| Ile                                          | VDW                     | H-Tyr100C, H-Tyr100D      |
| <b>Met17 (11.27)</b>                         |                         |                           |
| Met                                          | VDW                     | H-Tyr100D                 |
| <b>Glu22 (14.10)</b>                         |                         |                           |
| Glu                                          | VDW                     | H-Tyr100D                 |
| Glu <sup>Oε2</sup>                           | HB                      | H-Tyr100D <sup>OH</sup>   |
| <b>Lys24 (57.48)</b>                         |                         |                           |
| Lys                                          | VDW                     | H-Tyr100C, H-Tyr100B      |
| Lys <sup>Nζ</sup>                            | HB                      | H-Tyr100B <sup>O</sup>    |
| <b>Cys25 (4.82)</b>                          |                         |                           |
| Cys                                          | VDW                     | H-Tyr100A                 |
| <b>Glu26 (11.59)</b>                         |                         |                           |
| Glu                                          | VDW                     | H-Tyr100A                 |
| <b>Asn27 (16.77)</b>                         |                         |                           |
| Asn                                          | VDW                     | H-Tyr100A                 |
| <b>Asp28 (25.39)</b>                         |                         |                           |
| Asp                                          | VDW                     | L-Ser27E                  |
| <b>Asn81 (18.35)</b>                         |                         |                           |
| Asn                                          | VDW                     | L-Gly29, L-Ser52          |
| <b>Asn82 (39.24)</b>                         |                         |                           |
| Asn                                          | VDW                     | L-Gly29                   |
| <b>Val83 (43.40)</b>                         |                         |                           |
| Val                                          | VDW                     | L-Asn30, L-Asp28, L-Gly29 |
| <b>Gly95 (21.60)</b>                         |                         |                           |
| Gly                                          | VDW                     | L-Tyr49                   |
| Gly <sup>O</sup>                             | HB                      | L-Tyr49 <sup>OH</sup>     |
| <b>Gly97 (11.61)</b>                         |                         |                           |
| Gly                                          | VDW                     | H-Tyr100D                 |
| <b>Lys98 (30.24)</b>                         |                         |                           |
| Lys                                          | VDW                     | H-Tyr100D                 |
| Lys <sup>Nζ</sup>                            | HB                      | H-Tyr100D <sup>OH</sup>   |
| <b>Asn115 (39.67)</b>                        |                         |                           |
| Asn                                          | VDW                     | H-Tyr100D, H-Tyr100E      |
| Asn <sup>Nδ2</sup>                           | HB                      | H-Tyr100D <sup>O</sup>    |
| <b>Ile116 (5.75)</b>                         |                         |                           |
| Ile                                          | VDW                     | H-Tyr32                   |
| <b>Lys148 (32.42)</b>                        |                         |                           |
| Lys                                          | VDW                     | H-Tyr53, H-Asn54          |
| <b>Ala149 (39.58)</b>                        |                         |                           |

|                                      |     |                                                                                                  |
|--------------------------------------|-----|--------------------------------------------------------------------------------------------------|
| Ala                                  | VDW | H-Tyr53, H-Ser31, H-Thr30                                                                        |
| Ala <sup>O</sup>                     | HB  | H-Ser31 <sup>O<math>\gamma</math></sup>                                                          |
| <b>Val150 (65.19)</b>                |     |                                                                                                  |
| Val                                  | VDW | H-Tyr53, H-Ser31, H-Tyr100C, H-Asp98, H-Gly97                                                    |
| <b>Asp151 (133.27)</b>               |     |                                                                                                  |
| Asp                                  | VDW | H-Ser31, H-Tyr32, H-Tyr100C, H-Tyr100E, H-Tyr100D, H-Asp98, H-Gly97, H-Arg96, H-Asp95, H-Tyr100A |
| Asp <sup>N</sup>                     | HB  | H-Ser31 <sup>O</sup>                                                                             |
| Asp <sup>O<math>\delta</math>1</sup> | HB  | H-Gly97 <sup>N</sup>                                                                             |
| Asp <sup>O<math>\delta</math>2</sup> | HB  | H-Asp98 <sup>N</sup>                                                                             |
| <b>Gly152 (16.85)</b>                |     |                                                                                                  |
| Gly                                  | VDW | H-Tyr32, H-Tyr100E, H-Ser31                                                                      |
| Gly <sup>N</sup>                     | HB  | H-Tyr32 <sup>O<math>H</math></sup>                                                               |
| <b>Ile153 (25.60)</b>                |     |                                                                                                  |
| Ile                                  | VDW | H-Tyr100C, H-Tyr100D                                                                             |
| <b>Lys155 (33.99)</b>                |     |                                                                                                  |
| Lys                                  | VDW | H-Tyr53, H-Tyr100C, H-Tyr100A, H-Asp98                                                           |
| Lys <sup>N<math>\zeta</math></sup>   | HB  | H-Tyr100C <sup>O<math>H</math></sup>                                                             |
| Lys <sup>N<math>\zeta</math></sup>   | SB  | H-Asp98 <sup>O<math>\delta</math>2</sup>                                                         |
| <b>Asp157 (22.82)</b>                |     |                                                                                                  |
| Asp                                  | VDW | H-Tyr53, H-Asn54                                                                                 |
| Asp <sup>O<math>\delta</math>2</sup> | HB  | H-Tyr53 <sup>O<math>H</math></sup>                                                               |
| <b>Ile163 (29.79)</b>                |     |                                                                                                  |
| Ile                                  | VDW | H-Asn54                                                                                          |

**Supplementary Table 10: BSA ( $\text{\AA}^2$ ) and contact summary for Fab-Pfs25 crystal structures.**

| Antibody    | H-bonds / Salt Bridge |         |        | BSA ( $\text{\AA}^2$ ) |         |        | $K_D$          |
|-------------|-----------------------|---------|--------|------------------------|---------|--------|----------------|
|             | H-Chain               | L-Chain | Total  | H-Chain                | L-Chain | Total  |                |
| <b>1269</b> | 17 / 0                | 2 / 0   | 19 / 0 | 889.5                  | 239.5   | 1129.0 | 3.7 $\pm$ 0.3  |
| <b>1262</b> | 9 / 0                 | 6 / 0   | 15 / 0 | 534.8                  | 394.8   | 929.6  | 12.0 $\pm$ 0.4 |
| <b>1190</b> | 7 / 1                 | 10 / 2  | 17 / 3 | 621.7                  | 515.1   | 1136.8 | 6.7 $\pm$ 0.7  |
| <b>1276</b> | 6 / 0                 | 8 / 2   | 14 / 2 | 575.0                  | 529.0   | 1104.0 | 16.0 $\pm$ 2.5 |
| <b>1245</b> | 12 / 1                | 2 / 0   | 14 / 1 | 614.4                  | 188.7   | 803.1  | 31.0 $\pm$ 5.6 |
| <b>1260</b> | 11 / 1                | 1 / 0   | 12 / 1 | 681.6                  | 166.0   | 847.6  | 41.0 $\pm$ 9.8 |

**Supplementary Table 11: SMFA results of Feed #1 and #2.**

| Test mAb [ $\mu\text{g/ml}$ ] |        | Mean<br>oocysts | % Inhibition (%TRA) <sup>a</sup> |          |          |         |
|-------------------------------|--------|-----------------|----------------------------------|----------|----------|---------|
| AB1245                        | AB1269 |                 | Best-estimate                    | 95%CI Lo | 95%CI Hi | p-value |
| <b><i>Feed #1</i></b>         |        |                 |                                  |          |          |         |
| 0                             | 0      | 36.7            |                                  |          |          |         |
| 320                           | 0      | 3.7             | 90.1                             | 77.0     | 95.5     | 0.001   |
| 160                           | 0      | 8.9             | 75.9                             | 45.7     | 89.7     | 0.003   |
| 80                            | 0      | 15.7            | 57.4                             | -1.2     | 81.1     | 0.051   |
| 40                            | 0      | 18.1            | 50.8                             | -10.6    | 78.2     | 0.082   |
| 20                            | 0      | 25.2            | 31.5                             | -57.3    | 71.0     | 0.357   |
| 10                            | 0      | 30.7            | 16.3                             | -84.3    | 63.2     | 0.678   |
| 0                             | 320    | 0.9             | 97.7                             | 93.6     | 99.6     | 0.001   |
| 0                             | 160    | 1.4             | 96.3                             | 91.3     | 98.6     | 0.001   |
| 0                             | 80     | 4.8             | 87.1                             | 69.5     | 94.8     | 0.001   |
| 0                             | 40     | 5.5             | 85.0                             | 64.1     | 93.9     | 0.001   |
| 0                             | 20     | 14.7            | 59.9                             | 8.7      | 83.0     | 0.033   |
| 0                             | 10     | 18.4            | 49.9                             | -12.5    | 77.6     | 0.094   |
| <b><i>Feed #2</i></b>         |        |                 |                                  |          |          |         |
| 0                             | 0      | 19.3            |                                  |          |          |         |
| 350                           | 0      | 3.9             | 80.1                             | 54.2     | 91.3     | 0.001   |
| 140                           | 0      | 6.2             | 67.9                             | 26.6     | 86.2     | 0.004   |
| 56                            | 0      | 17.5            | 9.3                              | -113.8   | 62.2     | 0.783   |
| 22                            | 0      | 12.8            | 33.7                             | -46.6    | 70.9     | 0.320   |
| 9                             | 0      | 20.5            | -6.2                             | -142.5   | 55.4     | 0.876   |
| 0                             | 350    | 0.5             | 97.4                             | 93.9     | 99.0     | 0.001   |
| 0                             | 140    | 1.2             | 94.0                             | 86.4     | 97.5     | 0.001   |
| 0                             | 56     | 3.9             | 80.1                             | 53.3     | 91.3     | 0.002   |
| 0                             | 22     | 8.9             | 53.9                             | -3.6     | 80.2     | 0.060   |
| 0                             | 9      | 13.2            | 31.9                             | -55.7    | 69.9     | 0.335   |

<sup>a</sup> The best estimate and 95%CI of % inhibition, and the p-value (whether the observed inhibition was significantly different from zero) were calculated using a zero-inflated negative binomial model<sup>5</sup>.

**Supplementary Table 12: SMFA results of Feed #3 and #4.**

| Test mAb [ $\mu\text{g/ml}$ ] |        | Mean<br>oocysts | % Inhibition (%TRA) <sup>a</sup> |          |          |         |
|-------------------------------|--------|-----------------|----------------------------------|----------|----------|---------|
| AB1245                        | AB1269 |                 | Best-estimate                    | 95%CI Lo | 95%CI Hi | p-value |
| <b><i>Feed #3</i></b>         |        |                 |                                  |          |          |         |
| 0                             | 0      | 20.2            |                                  |          |          |         |
| 441                           | 0      | 1.1             | 94.5                             | 87.2     | 97.8     | 0.001   |
| 230                           | 0      | 3.9             | 80.6                             | 55.2     | 91.8     | 0.001   |
| 132                           | 0      | 5.4             | 73.2                             | 38.6     | 88.4     | 0.002   |
| 73                            | 0      | 9.8             | 51.4                             | -14.0    | 78.4     | 0.078   |
| 45                            | 0      | 10.9            | 45.9                             | -26.2    | 75.5     | 0.140   |
| 31                            | 0      | 13.4            | 33.7                             | -47.5    | 73.3     | 0.325   |
| 0                             | 110    | 2.5             | 87.6                             | 71.4     | 94.7     | 0.001   |
| 0                             | 53     | 2.5             | 87.8                             | 72.8     | 94.9     | 0.001   |
| 0                             | 27     | 8.8             | 56.6                             | -0.6     | 80.9     | 0.052   |
| 0                             | 13     | 12.9            | 36.0                             | -42.9    | 70.2     | 0.284   |
| 0                             | 7      | 12.7            | 37.0                             | -45.9    | 72.1     | 0.278   |
| 0                             | 4      | 16.7            | 17.4                             | -86.7    | 63.8     | 0.698   |
| 132                           | 27     | 2.0             | 90.3                             | 76.3     | 96.1     | 0.001   |
| 73                            | 13     | 4.0             | 80.4                             | 54.4     | 91.4     | 0.001   |
| 45                            | 7      | 10.2            | 49.4                             | -19.4    | 78.7     | 0.109   |
| 31                            | 4      | 14.7            | 27.3                             | -63.7    | 68.5     | 0.437   |
| <b><i>Feed #4</i></b>         |        |                 |                                  |          |          |         |
| 0                             | 0      | 19.2            |                                  |          |          |         |
| 441                           | 0      | 3.9             | 79.6                             | 53.9     | 91.3     | 0.003   |
| 230                           | 0      | 7.7             | 59.8                             | 8.0      | 82.3     | 0.032   |
| 132                           | 0      | 12.6            | 34.5                             | -58.3    | 71.7     | 0.324   |
| 73                            | 0      | 9.1             | 52.5                             | -10.5    | 81.5     | 0.088   |
| 45                            | 0      | 14.0            | 27.2                             | -78.4    | 69.4     | 0.463   |
| 0                             | 110    | 3.8             | 80.4                             | 51.7     | 93.7     | 0.002   |
| 0                             | 53     | 5.1             | 73.4                             | 37.8     | 88.6     | 0.002   |
| 0                             | 27     | 10.7            | 44.1                             | -32.7    | 75.9     | 0.165   |
| 0                             | 13     | 14.6            | 24.0                             | -65.4    | 64.8     | 0.508   |
| 0                             | 7      | 18.2            | 5.0                              | -114.3   | 57.5     | 0.915   |
| 132                           | 27     | 3.3             | 82.9                             | 54.2     | 94.0     | 0.002   |
| 73                            | 13     | 7.0             | 63.4                             | 18.7     | 83.9     | 0.010   |
| 45                            | 7      | 8.8             | 53.9                             | -0.9     | 78.8     | 0.052   |

<sup>a</sup> The best estimate and 95%CI of % inhibition, and the p-value (whether the observed inhibition was significantly different from zero) were calculated using a zero-inflated negative binomial model<sup>5</sup>.

## Supplementary References

1. Sievers, F. *et al.* Fast, scalable generation of high-quality protein multiple sequence alignments using Clustal Omega. *Mol Syst Biol* **7**, 539–539 (2011).
2. Molecular Operating Environment (MOE), 2013.08; *Chemical Computing Group ULC*, 1010 Sherbooke St. West, Suite #910, Montreal, QC, Canada, H3A 2R7, 2017.
3. Saxena, A. K. *et al.* The essential mosquito-stage P25 and P28 proteins from *Plasmodium* form tile-like triangular prisms. *Nat. Struct. Mol. Biol.* **13**, 90–91 (2006).
4. Baker, N. A., Sept, D., Joseph, S., Holst, M. J. & McCammon, J. A. Electrostatics of nanosystems: Application to microtubules and the ribosome. *Proc. Natl. Acad. Sci. U.S.A.* **98**, 10037–10041 (2001).
5. Miura, K. *et al.* Transmission-blocking activity is determined by transmission-reducing activity and number of control oocysts in *Plasmodium falciparum* standard membrane-feeding assay. *Vaccine* **34**, 4145–4151 (2016).
