# Supplementary material for: Molecular definition of multiple sites of antibody inhibition of malaria transmission-blocking vaccine antigen Pfs25
Source: PubMed Central journal article supplement (PMC5691035; doi:10.1038/s41467-017-01924-3), 2017-11-16
Supplement: 41467_2017_1924_MOESM3_ESM.pdf [file 41467_2017_1924_MOESM3_ESM.pdf]

**File Name:** Supplementary Data 1

**Description:** Anti-Pfs25 antibody variable sequences.
